# Supplementary material
Source: ML conference proceedings conference paper supplement (https://openaccess.thecvf.com/content/ICCV2023/html/Warburg_Nerfbusters_Removing_Ghostly_ICCV_2023_paper.html)
Supplement: Supplementary file 1 [file Warburg_Nerfbusters_Removing_Ghostly_ICCV_2023_supplemental.pdf]

# Supplementary material for Nerfbusters: Removing Ghostly Artifacts from Casually Captured NeRFs

Frederik Warburg\*

Aleksander Holynski

Ethan Weber\*

Angjoo Kanazawa

Matthew Tancik

University of California, Berkeley

|                  | Translation to NN | Rotation to NN |
|------------------|-------------------|----------------|
| Nerfbusters      | 0.62              | 28.51          |
| Synthetic [4]    | 0.29              | 18.12          |
| LLFF [3]         | 0.24              | 2.07           |
| Phototourism [2] | 0.01              | 9.47           |
| MipNeRF-360 [1]  | 0.07              | 10.49          |

Table 1: Average translation and rotation difference between eval poses and closest training poses (nearest neighbor (NN)). The proposed Nerfbusters dataset is larger in translation and rotation differences than the current popular NeRF datasets.

## 1. Supplement

In this document, we seek to provide more details about the proposed dataset, evaluation protocol, and per-scene results.

## 2. Dataset

We compare the proposed dataset with popular NeRF datasets. We first normalize each scene’s camera poses (train and evaluation cameras combined) to the range  $[-1, 1]$ . We then find the nearest training image for each evaluation image. We compute the translation and rotation difference between the nearest neighbors (NN) and average over the number of evaluation poses. Tab. 1 shows that the proposed Nerfbusters dataset has a larger translation and rotation difference between training and evaluation frames than existing popular NeRF datasets.

Tab. 1 compares translation and rotation differences between training and evaluation images. Although this is a useful approximation of the “difficulty” of the datasets, it does not encompass variations in the camera intrinsics, e.g. we can obtain a similar effect as a translation by changing the focal length. In practice though, a common assumption is that the same camera intrinsics are used for training and

test renderings. This assumption does not hold for the Phototourism [2] dataset, where the camera intrinsics vary for each training frame. Therefore, Tab. 1 is a crude approximation of difficulty for this dataset.

Figs. 1 to 5 show top-down views of training and evaluation views for each scene in the Synthetic [4], LLFF [3], MipNeRF-360 [1], Phototourism [2], and our Nerfbusters dataset. Most of the datasets use every 8th frame for evaluation, resulting in training and evaluation views being very close. The train and test frames are further apart in the Nerfbusters dataset, faithfully representing some of the real-world challenges that users of NeRF experience when rendering fly-throughs of their captured scenes.

## 3. Per-Scene Evaluation

We provide per-scene evaluation for our method and the baseline methods in Tabs. 2 to 13. The average over the 12 datasets is included in the main paper.

\*Denotes equal contribution

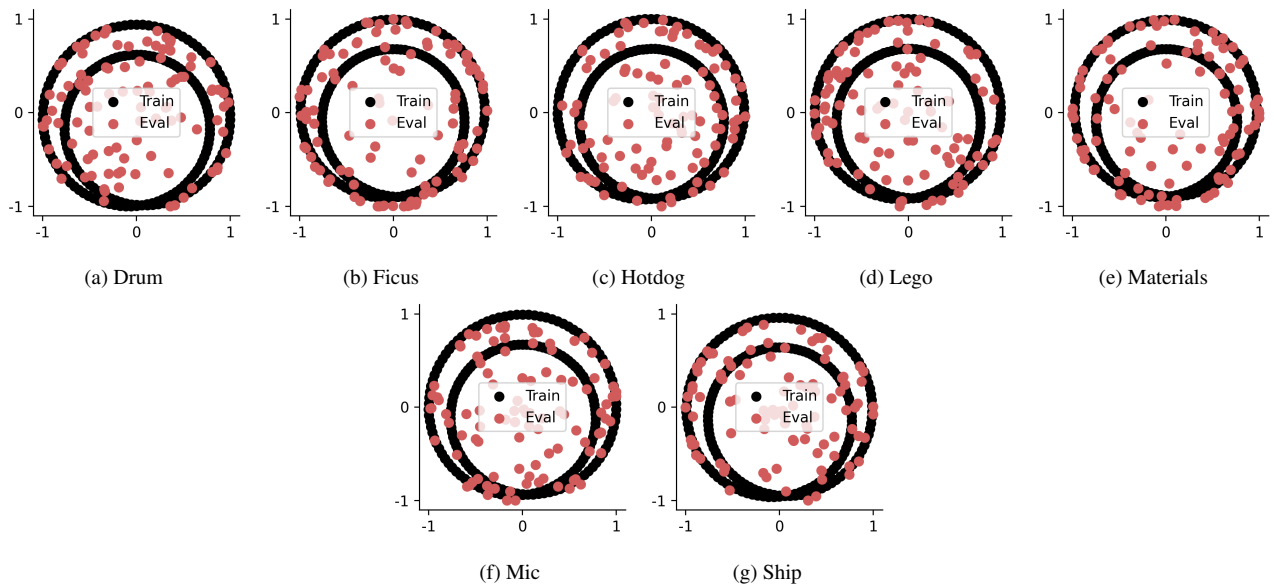

Figure 1: Synthetic NeRF.

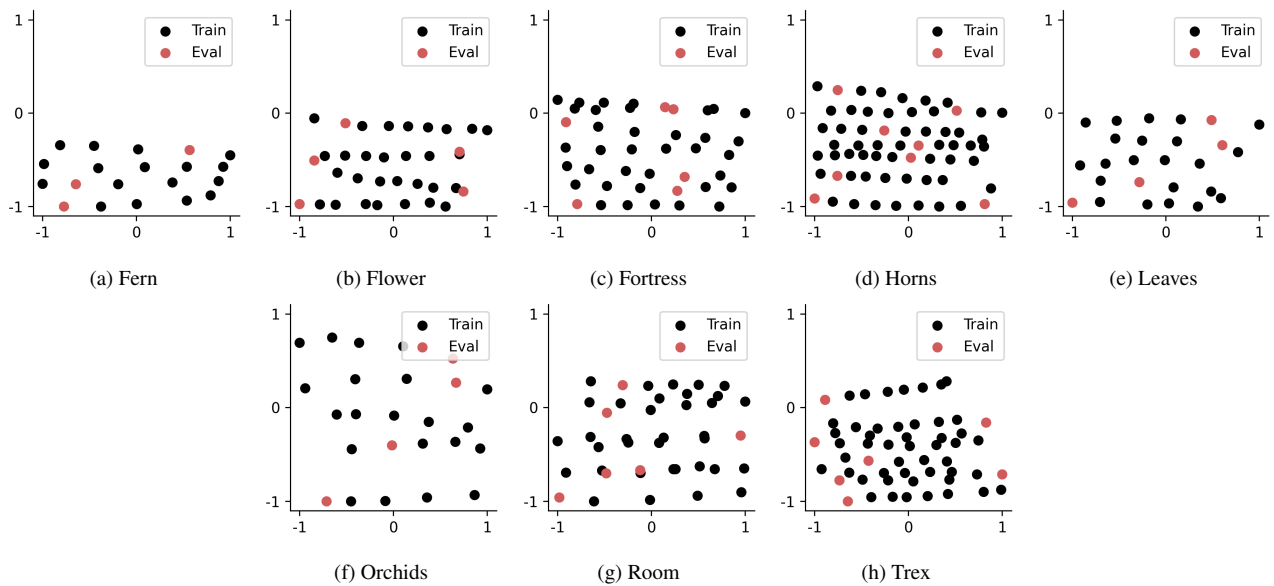

Figure 2: LLFF dataset.

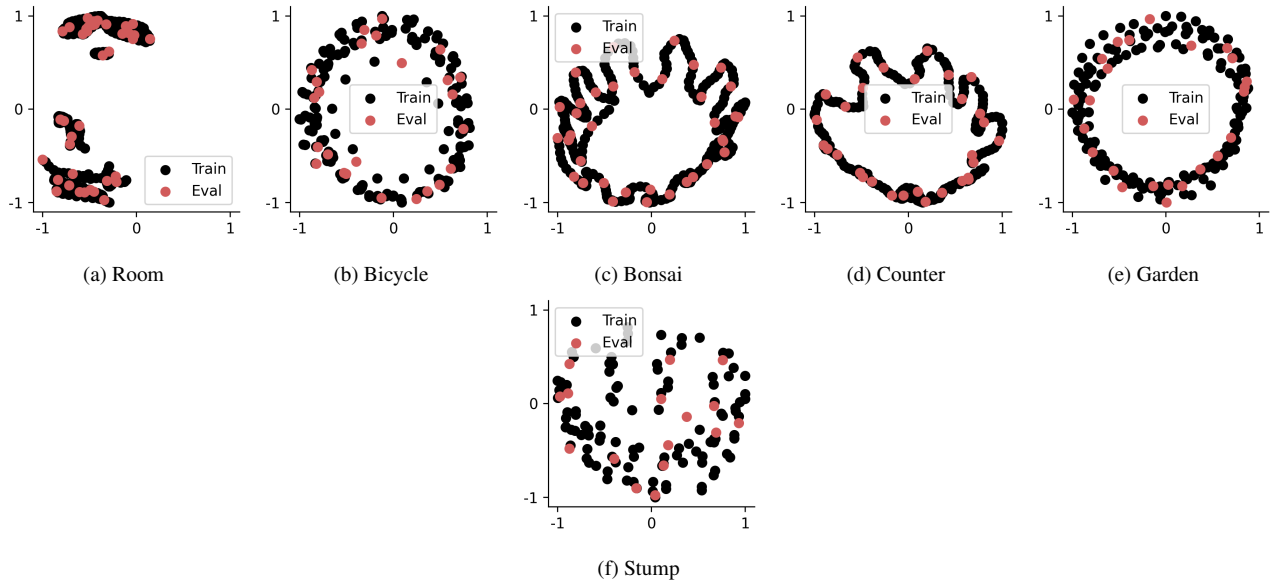

Figure 3: MipNeRF 360 dataset.

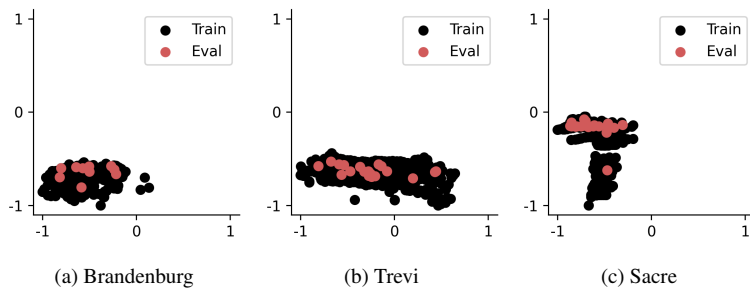

Figure 4: Phototourism dataset.

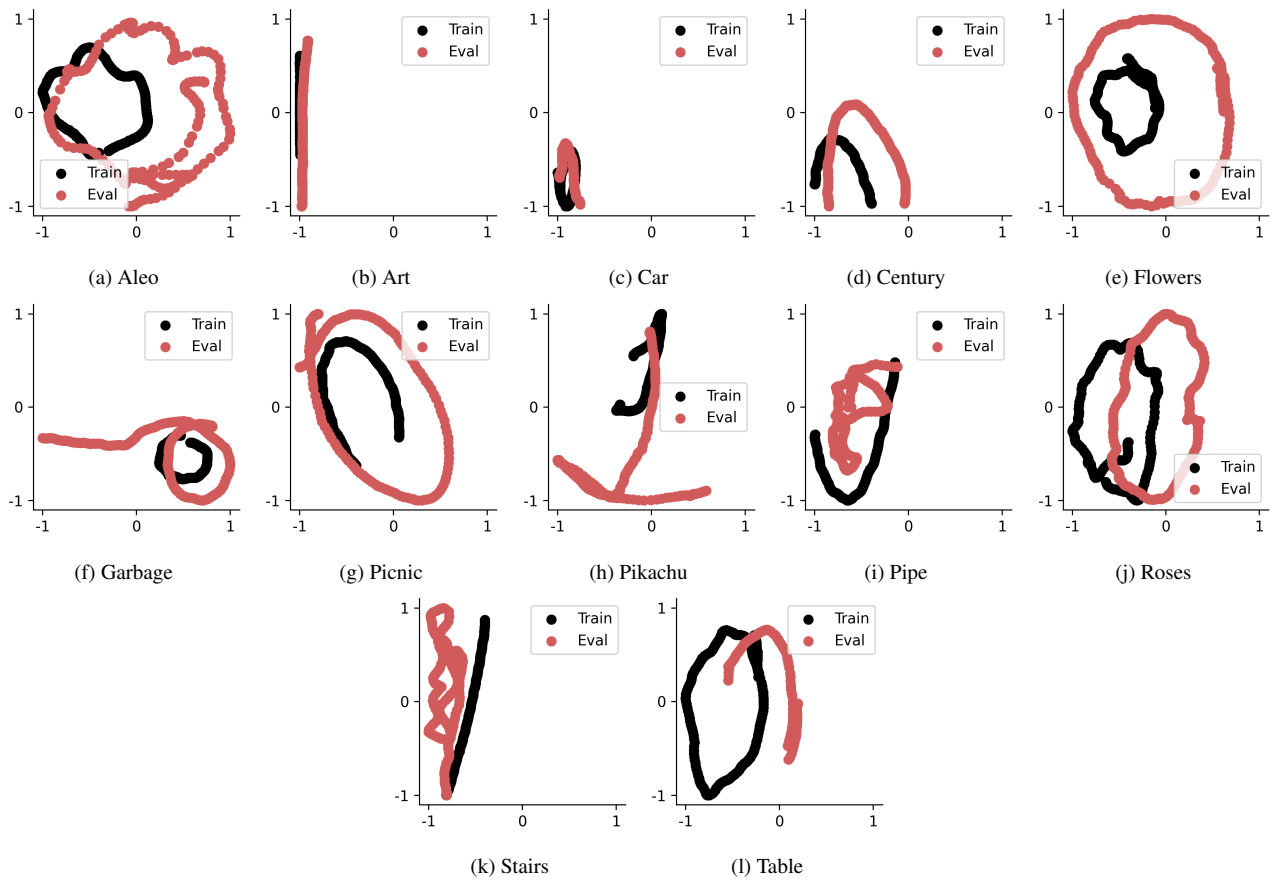

Figure 5: Nerfbusters dataset.

|                     | PSNR $\uparrow$ | SSIM $\uparrow$ | LPIPS $\downarrow$ | Depth $\downarrow$ | Disp. $\downarrow$ | Mean $^\circ$ $\downarrow$ | Median $^\circ$ $\downarrow$ | % 30 $^\circ$ $\uparrow$ | Coverage $\uparrow$ |
|---------------------|-----------------|-----------------|--------------------|--------------------|--------------------|----------------------------|------------------------------|--------------------------|---------------------|
| Nerfacto Pseudo GT  | 24.02           | 0.8591          | 0.0801             | 0.00               | 0.00               | 0.01                       | 0.00                         | 1.00                     | 0.84                |
| Nerfacto            | 18.33           | 0.6037          | 0.2968             | 0.01               | 0.04               | 45.50                      | 39.01                        | 0.37                     | 0.84                |
| + Visibility Loss   | 18.32           | 0.6063          | 0.2929             | 0.01               | 0.02               | 45.28                      | 38.81                        | 0.37                     | 0.84                |
| + Vis + Sparsity    | 18.41           | 0.6082          | 0.2895             | 0.01               | 0.02               | 45.19                      | 38.76                        | 0.37                     | 0.84                |
| + Vis + TV          | 18.31           | 0.6073          | 0.2983             | 0.01               | 0.02               | 46.12                      | 39.34                        | 0.36                     | 0.84                |
| + Vis + RegNeRF     | 18.31           | 0.6081          | 0.2933             | 0.01               | 0.02               | 45.44                      | 39.04                        | 0.37                     | 0.84                |
| + Vis + DSDS (Ours) | 18.75           | 0.6390          | 0.2441             | 0.01               | 0.02               | 45.43                      | 39.14                        | 0.36                     | 0.80                |

Table 2: “aloe” capture quantitative evaluation.

|                     | PSNR $\uparrow$ | SSIM $\uparrow$ | LPIPS $\downarrow$ | Depth $\downarrow$ | Disp. $\downarrow$ | Mean $^\circ$ $\downarrow$ | Median $^\circ$ $\downarrow$ | % 30 $^\circ$ $\uparrow$ | Coverage $\uparrow$ |
|---------------------|-----------------|-----------------|--------------------|--------------------|--------------------|----------------------------|------------------------------|--------------------------|---------------------|
| Nerfacto Pseudo GT  | 25.25           | 0.8534          | 0.0710             | 0.00               | 0.00               | 0.01                       | 0.00                         | 1.00                     | 0.88                |
| Nerfacto            | 14.72           | 0.3784          | 0.3978             | 1025.94            | 0.20               | 65.26                      | 60.02                        | 0.20                     | 0.87                |
| + Visibility Loss   | 14.77           | 0.3860          | 0.3933             | 1006.97            | 0.17               | 64.55                      | 59.30                        | 0.20                     | 0.86                |
| + Vis + Sparsity    | 14.86           | 0.3900          | 0.3901             | 907.83             | 0.17               | 64.48                      | 59.19                        | 0.20                     | 0.86                |
| + Vis + TV          | 15.02           | 0.3991          | 0.3838             | 719.83             | 0.16               | 68.80                      | 63.99                        | 0.17                     | 0.85                |
| + Vis + RegNeRF     | 13.30           | 0.2995          | 0.4647             | 1386.03            | 2.57               | 72.13                      | 67.93                        | 0.15                     | 0.89                |
| + Vis + DSDS (Ours) | 15.05           | 0.4336          | 0.3408             | 390.80             | 0.14               | 62.21                      | 56.89                        | 0.21                     | 0.74                |

Table 3: “art” capture quantitative evaluation.

|                     | PSNR $\uparrow$ | SSIM $\uparrow$ | LPIPS $\downarrow$ | Depth $\downarrow$ | Disp. $\downarrow$ | Mean $^\circ$ $\downarrow$ | Median $^\circ$ $\downarrow$ | % 30 $^\circ$ $\uparrow$ | Coverage $\uparrow$ |
|---------------------|-----------------|-----------------|--------------------|--------------------|--------------------|----------------------------|------------------------------|--------------------------|---------------------|
| Nerfacto Pseudo GT  | 22.98           | 0.7480          | 0.2093             | 0.00               | 0.00               | 0.01                       | 0.00                         | 1.00                     | 0.80                |
| Nerfacto            | 16.57           | 0.4630          | 0.4090             | 240.77             | 0.56               | 70.51                      | 66.31                        | 0.17                     | 0.81                |
| + Visibility Loss   | 16.67           | 0.4609          | 0.4136             | 133.80             | 0.51               | 70.19                      | 65.94                        | 0.18                     | 0.81                |
| + Vis + Sparsity    | 16.70           | 0.4632          | 0.4149             | 137.97             | 0.38               | 70.57                      | 66.38                        | 0.17                     | 0.81                |
| + Vis + TV          | 16.87           | 0.4827          | 0.3956             | 116.45             | 0.39               | 73.52                      | 69.63                        | 0.16                     | 0.78                |
| + Vis + RegNeRF     | 16.62           | 0.4654          | 0.4099             | 745.14             | 0.56               | 70.73                      | 66.59                        | 0.17                     | 0.82                |
| + Vis + DSDS (Ours) | 17.40           | 0.5898          | 0.2219             | 23.76              | 0.14               | 65.99                      | 60.43                        | 0.21                     | 0.55                |

Table 4: “car” capture quantitative evaluation.

|                     | PSNR $\uparrow$ | SSIM $\uparrow$ | LPIPS $\downarrow$ | Depth $\downarrow$ | Disp. $\downarrow$ | Mean $^\circ$ $\downarrow$ | Median $^\circ$ $\downarrow$ | % 30 $^\circ$ $\uparrow$ | Coverage $\uparrow$ |
|---------------------|-----------------|-----------------|--------------------|--------------------|--------------------|----------------------------|------------------------------|--------------------------|---------------------|
| Nerfacto Pseudo GT  | 23.76           | 0.8699          | 0.0790             | 0.00               | 0.00               | 0.01                       | 0.00                         | 1.00                     | 0.95                |
| Nerfacto            | 13.97           | 0.3938          | 0.4998             | 2.27               | 3.34               | 65.46                      | 59.70                        | 0.22                     | 0.97                |
| + Visibility Loss   | 13.90           | 0.4022          | 0.4858             | 1.27               | 3.50               | 63.58                      | 57.34                        | 0.24                     | 0.96                |
| + Vis + Sparsity    | 13.91           | 0.4021          | 0.4899             | 1.27               | 2.35               | 63.44                      | 57.26                        | 0.24                     | 0.96                |
| + Vis + TV          | 14.25           | 0.4286          | 0.4464             | 1.03               | 1.40               | 69.38                      | 64.59                        | 0.18                     | 0.96                |
| + Vis + RegNeRF     | 12.63           | 0.3459          | 0.5672             | 2.84               | 3.95               | 71.88                      | 67.44                        | 0.18                     | 0.97                |
| + Vis + DSDS (Ours) | 15.01           | 0.5028          | 0.2840             | 0.41               | 0.35               | 59.15                      | 52.75                        | 0.25                     | 0.72                |

Table 5: “century” capture quantitative evaluation.

|                     | PSNR $\uparrow$ | SSIM $\uparrow$ | LPIPS $\downarrow$ | Depth $\downarrow$ | Disp. $\downarrow$ | Mean $^\circ$ $\downarrow$ | Median $^\circ$ $\downarrow$ | % 30 $^\circ$ $\uparrow$ | Coverage $\uparrow$ |
|---------------------|-----------------|-----------------|--------------------|--------------------|--------------------|----------------------------|------------------------------|--------------------------|---------------------|
| Nerfacto Pseudo GT  | 26.67           | 0.8687          | 0.1044             | 0.00               | 0.00               | 0.01                       | 0.00                         | 1.00                     | 0.97                |
| Nerfacto            | 15.68           | 0.4654          | 0.4413             | 14.28              | 0.22               | 65.45                      | 60.02                        | 0.20                     | 0.93                |
| + Visibility Loss   | 15.77           | 0.4691          | 0.4322             | 17.25              | 0.12               | 65.35                      | 59.92                        | 0.21                     | 0.93                |
| + Vis + Sparsity    | 15.67           | 0.4667          | 0.4309             | 17.21              | 0.12               | 65.31                      | 59.87                        | 0.21                     | 0.93                |
| + Vis + TV          | 15.47           | 0.4718          | 0.4314             | 13.03              | 0.11               | 68.00                      | 62.88                        | 0.19                     | 0.91                |
| + Vis + RegNeRF     | 15.67           | 0.4649          | 0.4356             | 13.85              | 0.12               | 65.68                      | 60.26                        | 0.20                     | 0.93                |
| + Vis + DSDS (Ours) | 15.52           | 0.5086          | 0.3156             | 5.77               | 0.08               | 61.18                      | 54.47                        | 0.24                     | 0.62                |

Table 6: “flowers” capture quantitative evaluation.

|                     | PSNR $\uparrow$ | SSIM $\uparrow$ | LPIPS $\downarrow$ | Depth $\downarrow$ | Disp. $\downarrow$ | Mean $^\circ$ $\downarrow$ | Median $^\circ$ $\downarrow$ | % 30 $^\circ$ $\uparrow$ | Coverage $\uparrow$ |
|---------------------|-----------------|-----------------|--------------------|--------------------|--------------------|----------------------------|------------------------------|--------------------------|---------------------|
| Nerfacto Pseudo GT  | 24.09           | 0.8151          | 0.1424             | 0.00               | 0.00               | 0.01                       | 0.00                         | 1.00                     | 1.00                |
| Nerfacto            | 14.86           | 0.4047          | 0.5072             | 0.09               | 10.81              | 63.75                      | 58.69                        | 0.25                     | 1.00                |
| + Visibility Loss   | 14.91           | 0.4197          | 0.4973             | 0.02               | 6.65               | 62.67                      | 57.31                        | 0.25                     | 1.00                |
| + Vis + Sparsity    | 15.04           | 0.4193          | 0.4977             | 0.02               | 9.29               | 62.27                      | 56.90                        | 0.26                     | 1.00                |
| + Vis + TV          | 15.20           | 0.4212          | 0.5110             | 0.04               | 1.18               | 73.74                      | 70.17                        | 0.15                     | 1.00                |
| + Vis + RegNeRF     | 15.13           | 0.4205          | 0.4926             | 0.03               | 5.42               | 63.18                      | 57.80                        | 0.25                     | 1.00                |
| + Vis + DSDS (Ours) | 15.86           | 0.4466          | 0.3726             | 0.00               | 0.11               | 53.09                      | 45.57                        | 0.31                     | 0.63                |

Table 7: “garbage” capture quantitative evaluation.

|                     | PSNR $\uparrow$ | SSIM $\uparrow$ | LPIPS $\downarrow$ | Depth $\downarrow$ | Disp. $\downarrow$ | Mean $^\circ$ $\downarrow$ | Median $^\circ$ $\downarrow$ | % 30 $^\circ$ $\uparrow$ | Coverage $\uparrow$ |
|---------------------|-----------------|-----------------|--------------------|--------------------|--------------------|----------------------------|------------------------------|--------------------------|---------------------|
| Nerfacto Pseudo GT  | 23.44           | 0.7616          | 0.1774             | 0.00               | 0.00               | 0.01                       | 0.00                         | 1.00                     | 0.95                |
| Nerfacto            | 15.99           | 0.3123          | 0.5019             | 0.12               | 1.17               | 61.20                      | 55.39                        | 0.24                     | 0.96                |
| + Visibility Loss   | 15.93           | 0.3117          | 0.4992             | 0.11               | 0.90               | 60.57                      | 54.66                        | 0.25                     | 0.96                |
| + Vis + Sparsity    | 15.97           | 0.3145          | 0.4992             | 0.10               | 0.77               | 60.91                      | 55.02                        | 0.25                     | 0.96                |
| + Vis + TV          | 16.03           | 0.3168          | 0.5123             | 0.11               | 0.76               | 68.94                      | 63.99                        | 0.19                     | 0.96                |
| + Vis + RegNeRF     | 15.77           | 0.3014          | 0.5149             | 0.14               | 1.12               | 62.16                      | 56.47                        | 0.23                     | 0.96                |
| + Vis + DSDS (Ours) | 15.72           | 0.4560          | 0.3074             | 0.11               | 0.12               | 54.32                      | 46.71                        | 0.31                     | 0.58                |

Table 8: “picnic” capture quantitative evaluation.

|                     | PSNR $\uparrow$ | SSIM $\uparrow$ | LPIPS $\downarrow$ | Depth $\downarrow$ | Disp. $\downarrow$ | Mean $^\circ$ $\downarrow$ | Median $^\circ$ $\downarrow$ | % 30 $^\circ$ $\uparrow$ | Coverage $\uparrow$ |
|---------------------|-----------------|-----------------|--------------------|--------------------|--------------------|----------------------------|------------------------------|--------------------------|---------------------|
| Nerfacto Pseudo GT  | 31.69           | 0.9606          | 0.0399             | 0.00               | 0.00               | 0.01                       | 0.00                         | 1.00                     | 0.92                |
| Nerfacto            | 20.31           | 0.6903          | 0.3267             | 0.60               | 0.83               | 56.86                      | 48.00                        | 0.29                     | 0.93                |
| + Visibility Loss   | 25.83           | 0.8837          | 0.0874             | 0.01               | 0.01               | 42.55                      | 34.20                        | 0.44                     | 0.77                |
| + Vis + Sparsity    | 25.79           | 0.8806          | 0.0909             | 0.00               | 0.01               | 42.59                      | 34.28                        | 0.44                     | 0.77                |
| + Vis + TV          | 26.23           | 0.9000          | 0.0867             | 0.00               | 0.01               | 47.29                      | 40.29                        | 0.36                     | 0.71                |
| + Vis + RegNeRF     | 25.24           | 0.8734          | 0.0970             | 0.01               | 0.01               | 42.62                      | 34.26                        | 0.44                     | 0.77                |
| + Vis + DSDS (Ours) | 25.71           | 0.9048          | 0.0502             | 0.00               | 0.00               | 45.90                      | 39.17                        | 0.36                     | 0.28                |

Table 9: “pikachu” capture quantitative evaluation.

|                     | PSNR $\uparrow$ | SSIM $\uparrow$ | LPIPS $\downarrow$ | Depth $\downarrow$ | Disp. $\downarrow$ | Mean $^\circ$ $\downarrow$ | Median $^\circ$ $\downarrow$ | % 30 $^\circ$ $\uparrow$ | Coverage $\uparrow$ |
|---------------------|-----------------|-----------------|--------------------|--------------------|--------------------|----------------------------|------------------------------|--------------------------|---------------------|
| Nerfacto Pseudo GT  | 23.38           | 0.8008          | 0.1384             | 0.00               | 0.00               | 0.01                       | 0.00                         | 1.00                     | 0.93                |
| Nerfacto            | 19.62           | 0.5910          | 0.2673             | 0.08               | 0.07               | 59.62                      | 53.54                        | 0.25                     | 0.93                |
| + Visibility Loss   | 19.61           | 0.5914          | 0.2637             | 0.08               | 0.07               | 59.27                      | 53.12                        | 0.25                     | 0.93                |
| + Vis + Sparsity    | 19.67           | 0.5906          | 0.2697             | 0.07               | 0.07               | 60.28                      | 54.29                        | 0.24                     | 0.93                |
| + Vis + TV          | 19.64           | 0.5891          | 0.2793             | 0.07               | 0.07               | 65.09                      | 59.67                        | 0.20                     | 0.93                |
| + Vis + RegNeRF     | 19.62           | 0.5917          | 0.2665             | 0.15               | 0.07               | 59.46                      | 53.35                        | 0.25                     | 0.93                |
| + Vis + DSDS (Ours) | 19.23           | 0.6165          | 0.2387             | 0.08               | 0.08               | 58.58                      | 52.35                        | 0.26                     | 0.82                |

Table 10: “pipe” capture quantitative evaluation.

|                     | PSNR $\uparrow$ | SSIM $\uparrow$ | LPIPS $\downarrow$ | Depth $\downarrow$ | Disp. $\downarrow$ | Mean $^\circ$ $\downarrow$ | Median $^\circ$ $\downarrow$ | % 30 $^\circ$ $\uparrow$ | Coverage $\uparrow$ |
|---------------------|-----------------|-----------------|--------------------|--------------------|--------------------|----------------------------|------------------------------|--------------------------|---------------------|
| Nerfacto Pseudo GT  | 29.66           | 0.9349          | 0.0476             | 0.00               | 0.00               | 0.01                       | 0.00                         | 1.00                     | 0.57                |
| Nerfacto            | 16.42           | 0.6146          | 0.3479             | 229.88             | 0.38               | 74.54                      | 70.76                        | 0.17                     | 0.71                |
| + Visibility Loss   | 20.55           | 0.7090          | 0.1824             | 40.48              | 0.05               | 60.30                      | 52.21                        | 0.28                     | 0.39                |
| + Vis + Sparsity    | 20.48           | 0.7066          | 0.1867             | 40.85              | 0.05               | 59.98                      | 51.79                        | 0.28                     | 0.39                |
| + Vis + TV          | 20.61           | 0.7148          | 0.1723             | 36.89              | 0.05               | 60.68                      | 52.63                        | 0.27                     | 0.39                |
| + Vis + RegNeRF     | 20.37           | 0.7038          | 0.1866             | 40.52              | 0.05               | 60.35                      | 52.25                        | 0.28                     | 0.39                |
| + Vis + DSDS (Ours) | 20.20           | 0.7535          | 0.1254             | 232.09             | 0.03               | 55.40                      | 46.52                        | 0.32                     | 0.25                |

Table 11: “plant” capture quantitative evaluation.

|                     | PSNR $\uparrow$ | SSIM $\uparrow$ | LPIPS $\downarrow$ | Depth $\downarrow$ | Disp. $\downarrow$ | Mean $^\circ$ $\downarrow$ | Median $^\circ$ $\downarrow$ | % 30 $^\circ$ $\uparrow$ | Coverage $\uparrow$ |
|---------------------|-----------------|-----------------|--------------------|--------------------|--------------------|----------------------------|------------------------------|--------------------------|---------------------|
| Nerfacto Pseudo GT  | 29.51           | 0.9186          | 0.0554             | 0.00               | 0.00               | 0.01                       | 0.00                         | 1.00                     | 0.91                |
| Nerfacto            | 19.96           | 0.7159          | 0.2383             | 1.23               | 0.02               | 47.34                      | 40.24                        | 0.36                     | 0.92                |
| + Visibility Loss   | 19.94           | 0.7173          | 0.2412             | 0.64               | 0.02               | 46.67                      | 39.59                        | 0.37                     | 0.92                |
| + Vis + Sparsity    | 19.92           | 0.7195          | 0.2416             | 0.64               | 0.02               | 46.34                      | 39.34                        | 0.37                     | 0.92                |
| + Vis + TV          | 19.94           | 0.7190          | 0.2428             | 0.69               | 0.02               | 47.26                      | 40.16                        | 0.36                     | 0.92                |
| + Vis + RegNeRF     | 19.83           | 0.7168          | 0.2424             | 0.61               | 0.02               | 47.21                      | 40.14                        | 0.36                     | 0.92                |
| + Vis + DSDS (Ours) | 19.14           | 0.7149          | 0.2076             | 0.37               | 0.03               | 47.27                      | 40.45                        | 0.35                     | 0.87                |

Table 12: “roses” capture quantitative evaluation.

|                     | PSNR $\uparrow$ | SSIM $\uparrow$ | LPIPS $\downarrow$ | Depth $\downarrow$ | Disp. $\downarrow$ | Mean $^\circ$ $\downarrow$ | Median $^\circ$ $\downarrow$ | % 30 $^\circ$ $\uparrow$ | Coverage $\uparrow$ |
|---------------------|-----------------|-----------------|--------------------|--------------------|--------------------|----------------------------|------------------------------|--------------------------|---------------------|
| Nerfacto Pseudo GT  | 27.30           | 0.9180          | 0.0784             | 0.00               | 0.00               | 0.01                       | 0.00                         | 1.00                     | 0.99                |
| Nerfacto            | 17.60           | 0.6877          | 0.3259             | 0.04               | 0.47               | 52.08                      | 43.98                        | 0.33                     | 0.89                |
| + Visibility Loss   | 17.51           | 0.6878          | 0.3294             | 0.04               | 0.48               | 51.82                      | 43.62                        | 0.34                     | 0.88                |
| + Vis + Sparsity    | 17.35           | 0.6818          | 0.3330             | 0.04               | 0.48               | 51.86                      | 43.71                        | 0.33                     | 0.88                |
| + Vis + TV          | 16.49           | 0.6895          | 0.3311             | 0.04               | 0.41               | 54.34                      | 46.63                        | 0.31                     | 0.86                |
| + Vis + RegNeRF     | 17.39           | 0.6832          | 0.3318             | 0.04               | 0.48               | 51.89                      | 43.67                        | 0.34                     | 0.88                |
| + Vis + DSDS (Ours) | 18.23           | 0.7060          | 0.2867             | 0.02               | 0.28               | 48.67                      | 41.31                        | 0.35                     | 0.69                |

Table 13: “table” capture quantitative evaluation.

## References

- [1] Jonathan T Barron, Ben Mildenhall, Dor Verbin, Pratul P Srinivasan, and Peter Hedman. Mip-nerf 360: Unbounded anti-aliased neural radiance fields. In *Proceedings of the IEEE/CVF Conference on Computer Vision and Pattern Recognition*, pages 5470–5479, 2022. [1](#)
- [2] Yuhe Jin, Dmytro Mishkin, Anastasiia Mishchuk, Jiri Matas, Pascal Fua, Kwang Moo Yi, and Eduard Trulls. Image matching across wide baselines: From paper to practice. *International Journal of Computer Vision*, 129(2):517–547, 2021. [1](#)
- [3] Ben Mildenhall, Pratul P. Srinivasan, Rodrigo Ortiz-Cayon, Nima Khademi Kalantari, Ravi Ramamoorthi, Ren Ng, and Abhishek Kar. Local light field fusion: Practical view synthesis with prescriptive sampling guidelines. *ACM Transactions on Graphics (TOG)*, 2019. [1](#)
- [4] Ben Mildenhall, Pratul P Srinivasan, Matthew Tancik, Jonathan T Barron, Ravi Ramamoorthi, and Ren Ng. Nerf: Representing scenes as neural radiance fields for view synthesis. *Communications of the ACM*, 65(1):99–106, 2021. [1](#)
